# Supplementary material for: 3D genomic features across >50 diverse cell types reveal insights into the genomic architecture of childhood obesity
Source: bioRxiv or medRxiv preprint supplement (doi:10.1101/2023.08.30.23294092), 2024-08-13

eFigure 1

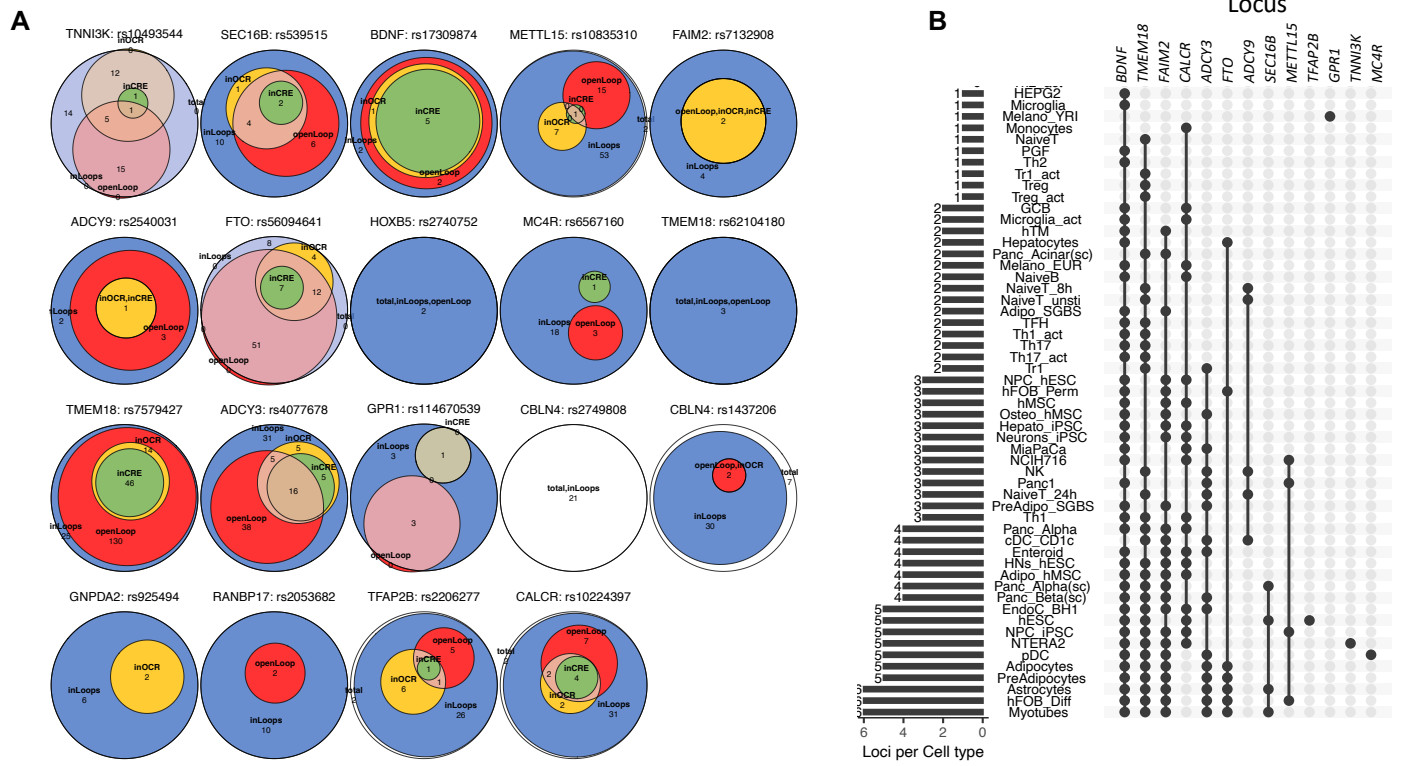

**eFigure 2**

**A. *TFAP2B* locus in hESC**

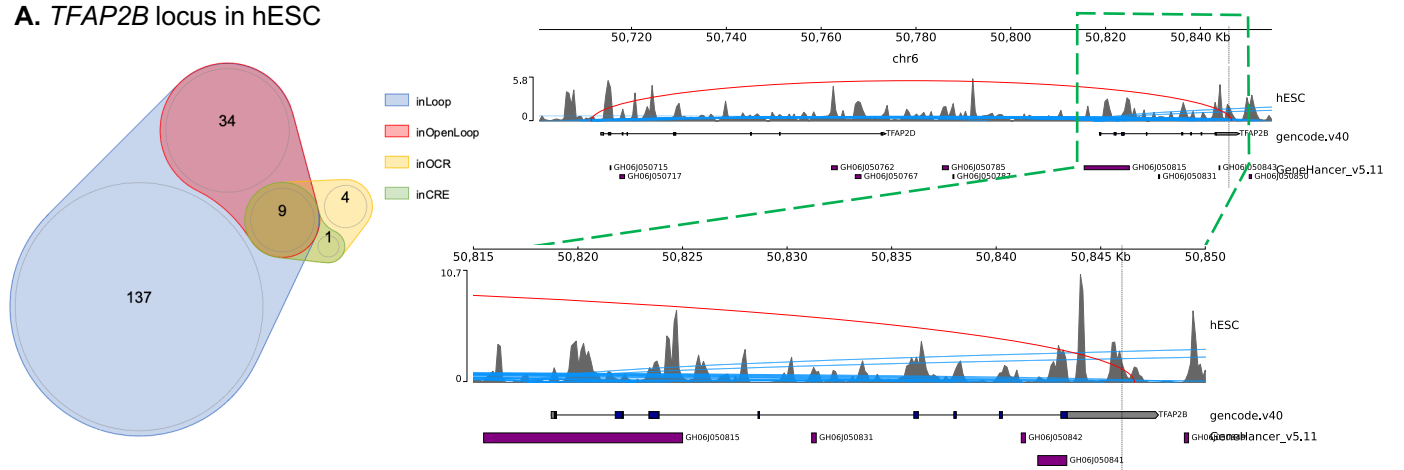

**B. *GPR1* locus in Melano\_YRI**

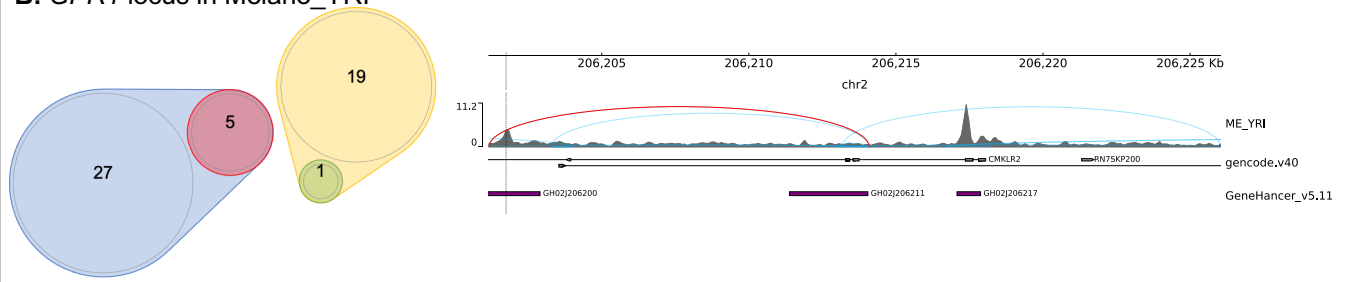



eFigure 4

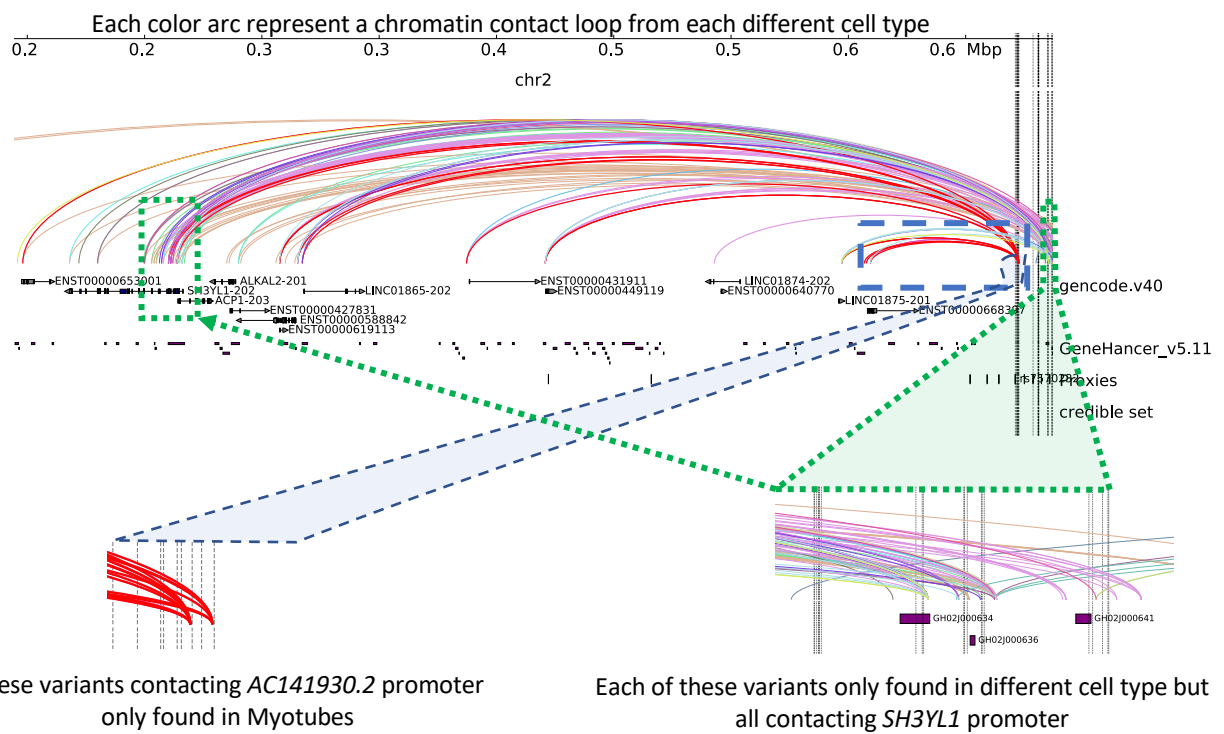

eFigure 5

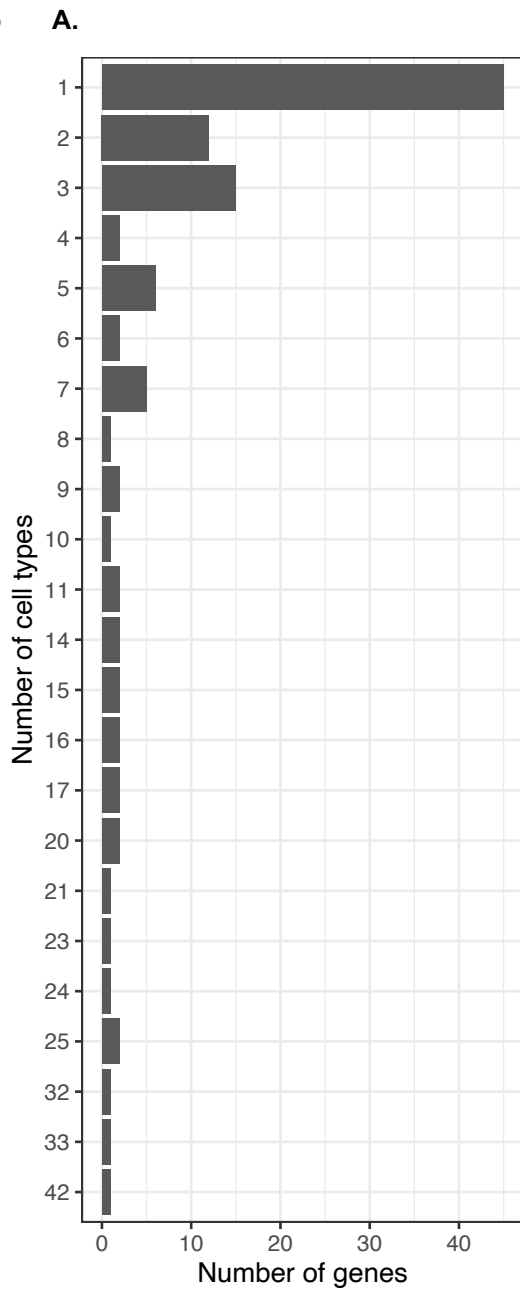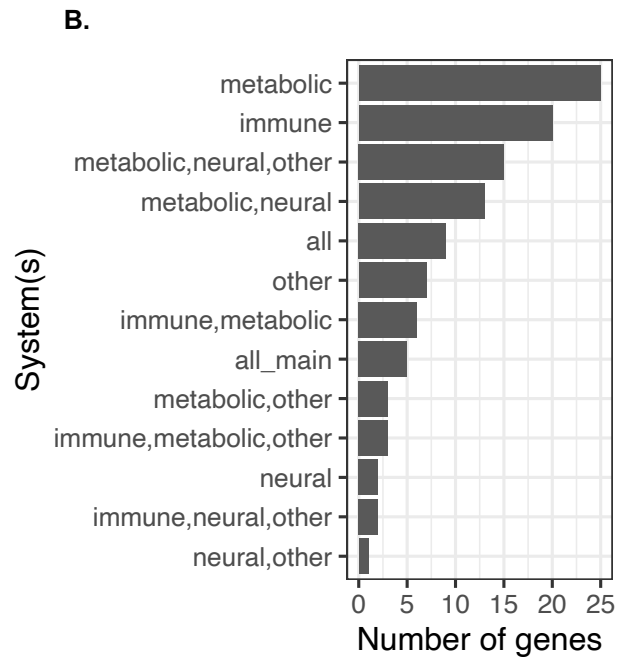

**eFigure 6**

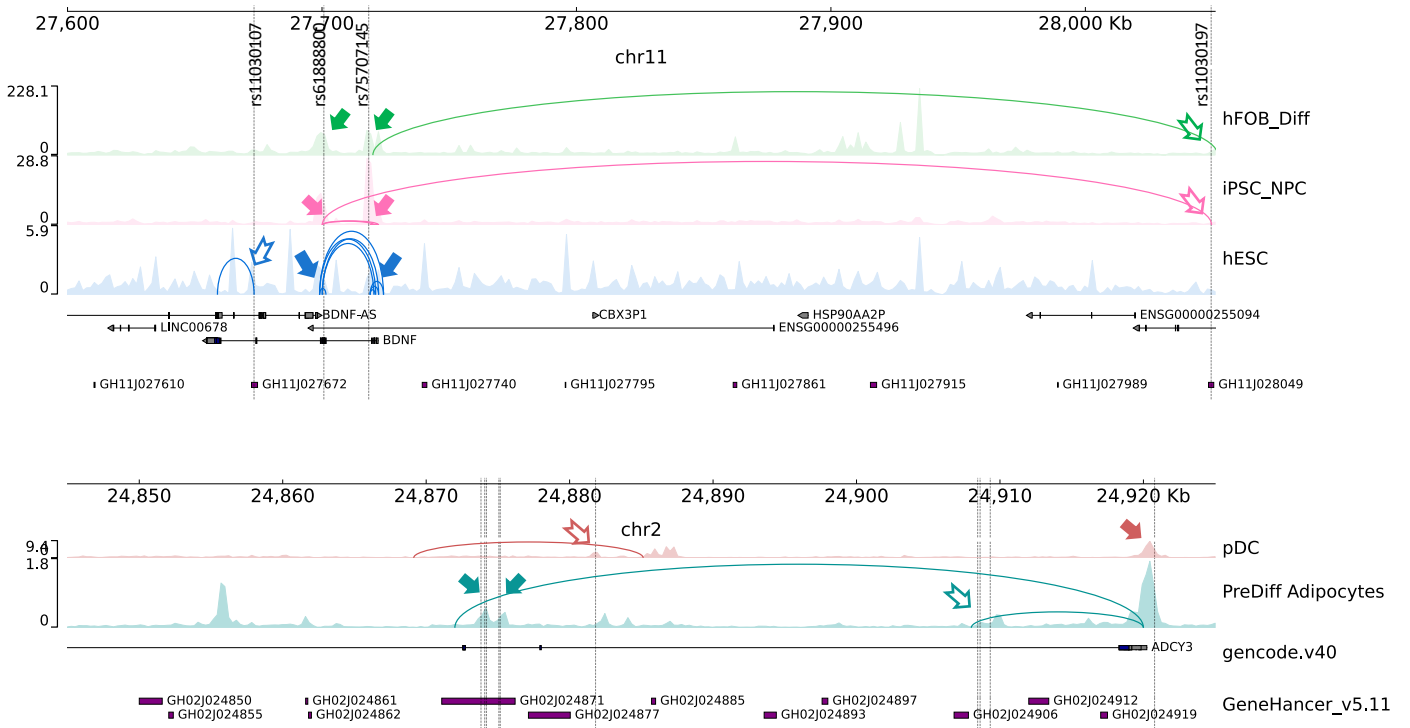

eFigure 7

**A**

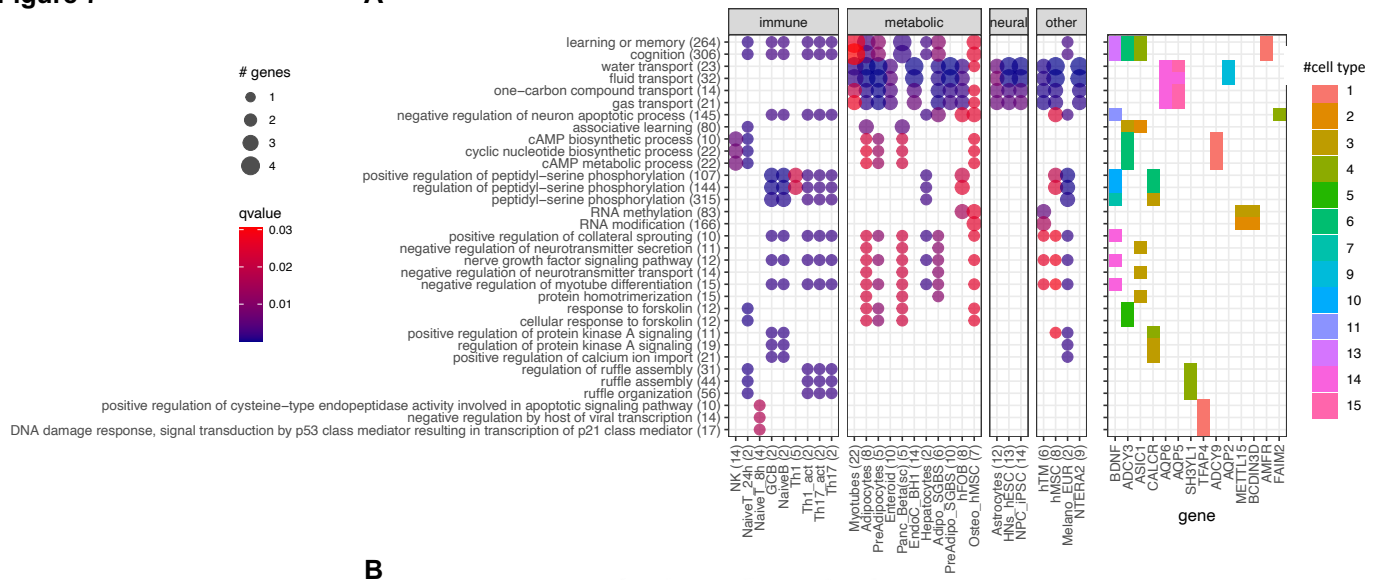

**B**

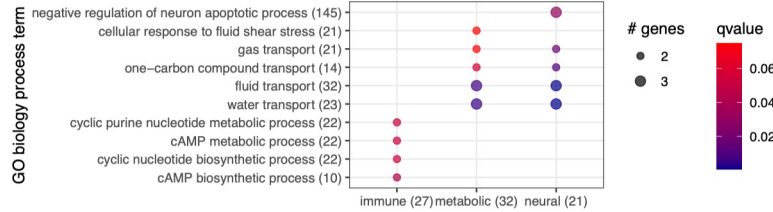

eFigure 8

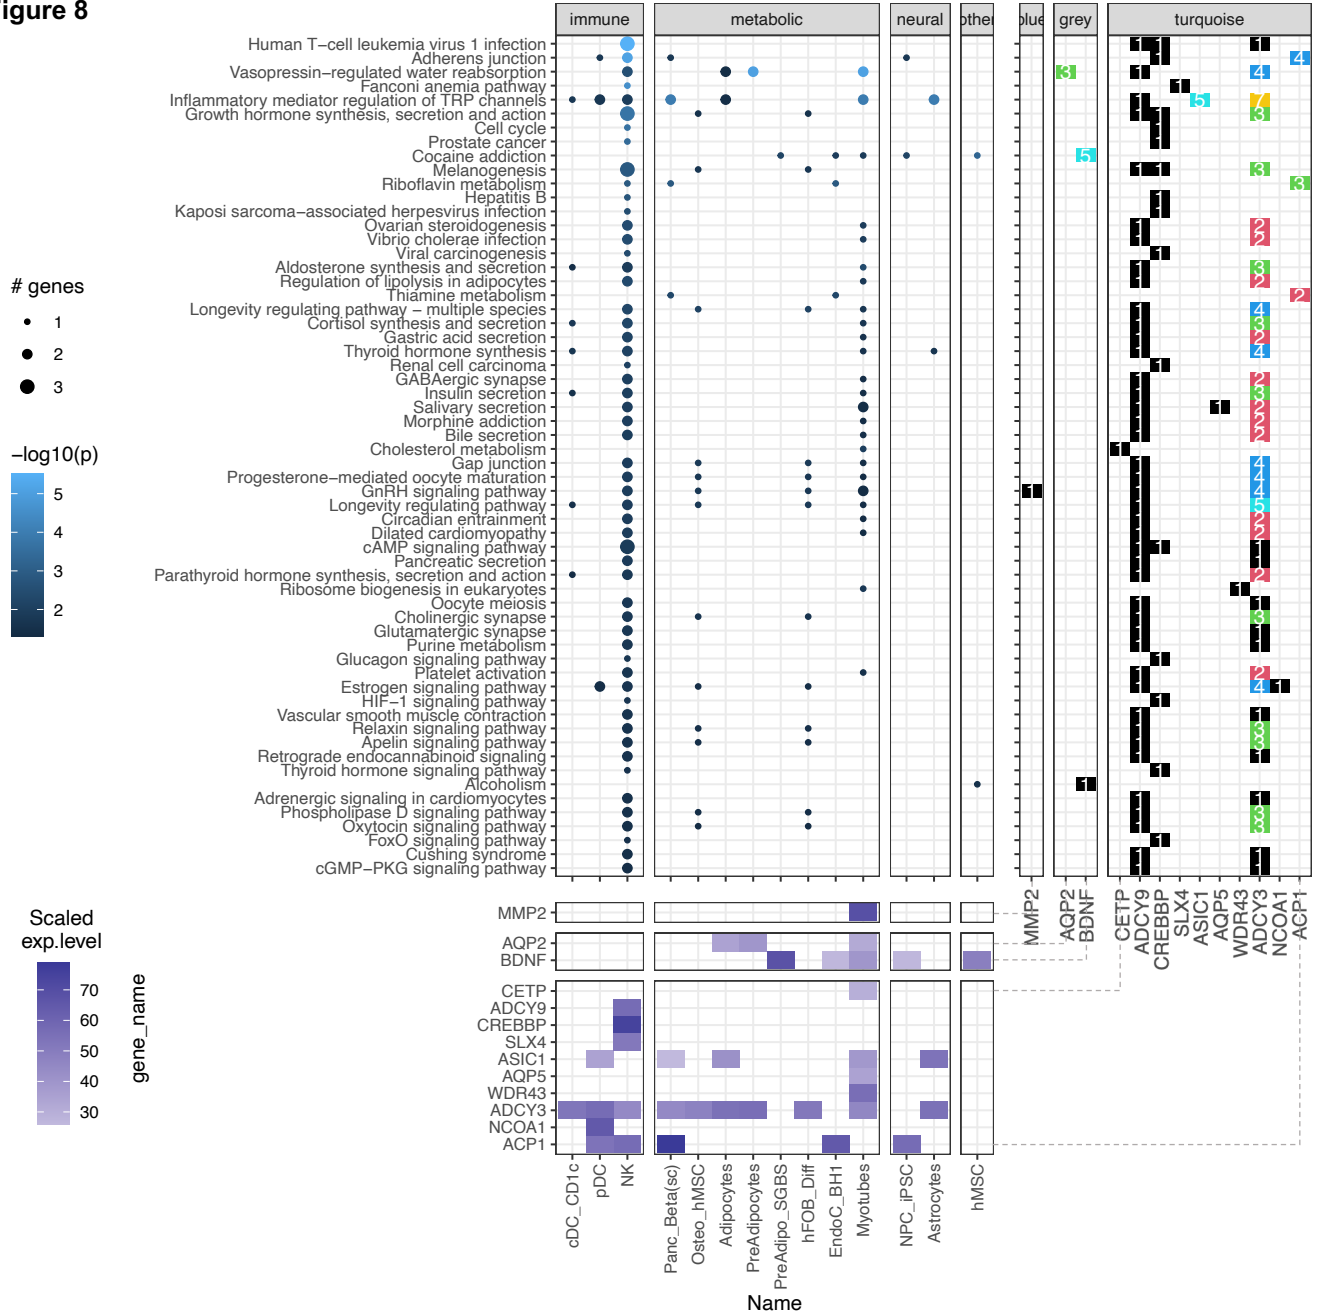



eFigure 9

A.

Original SPIA metrics

Our additional metrics

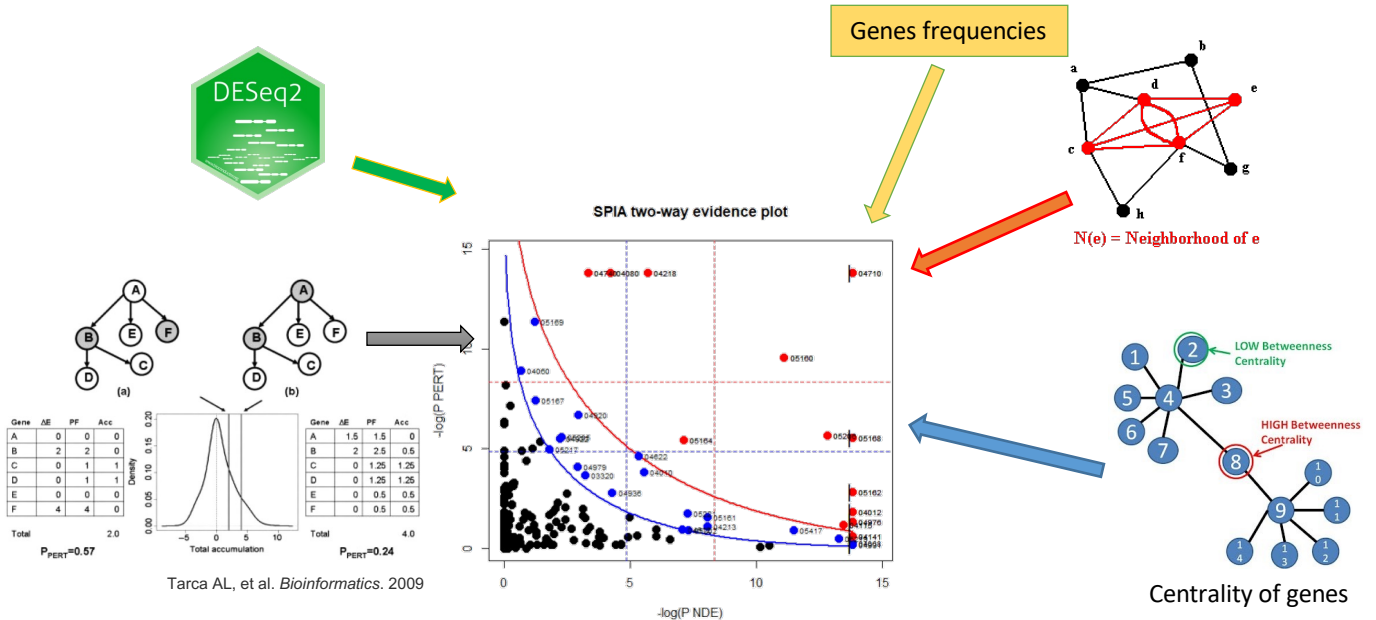

B.

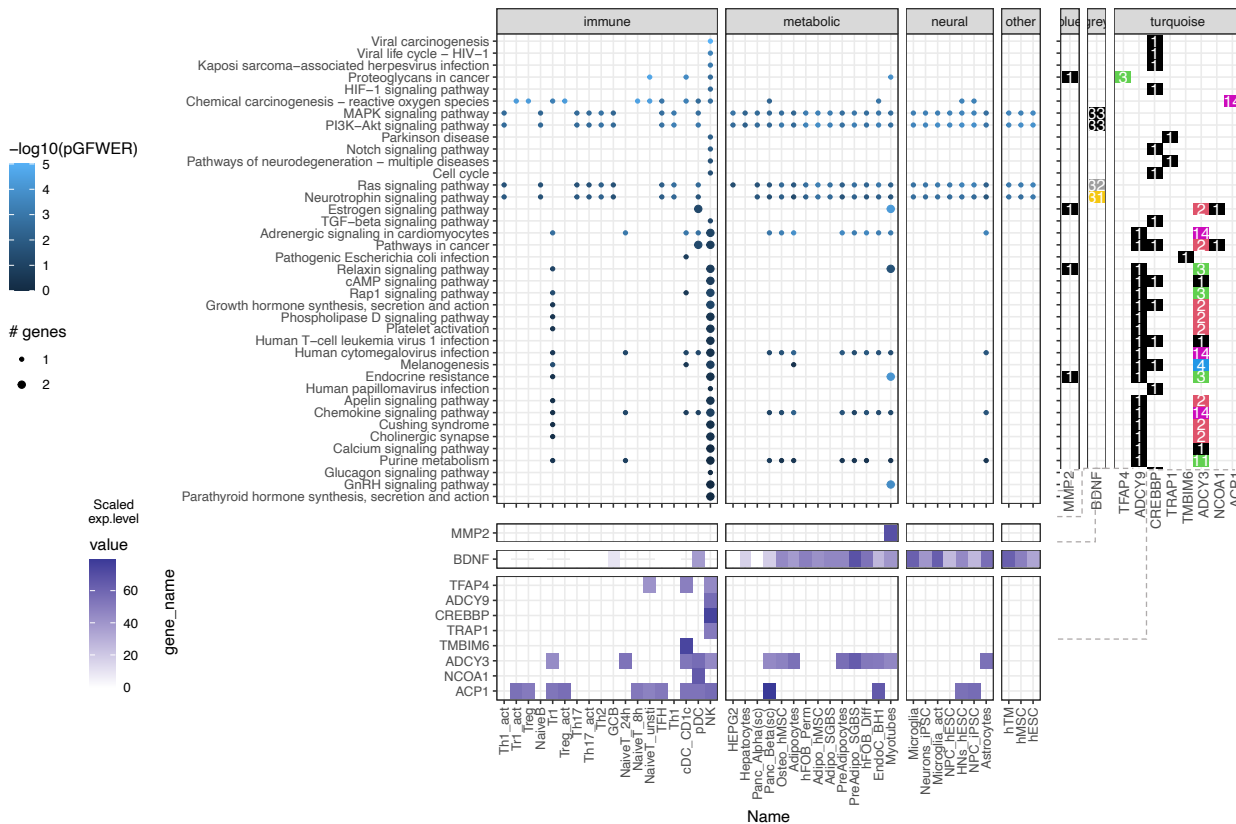

eFigure 10

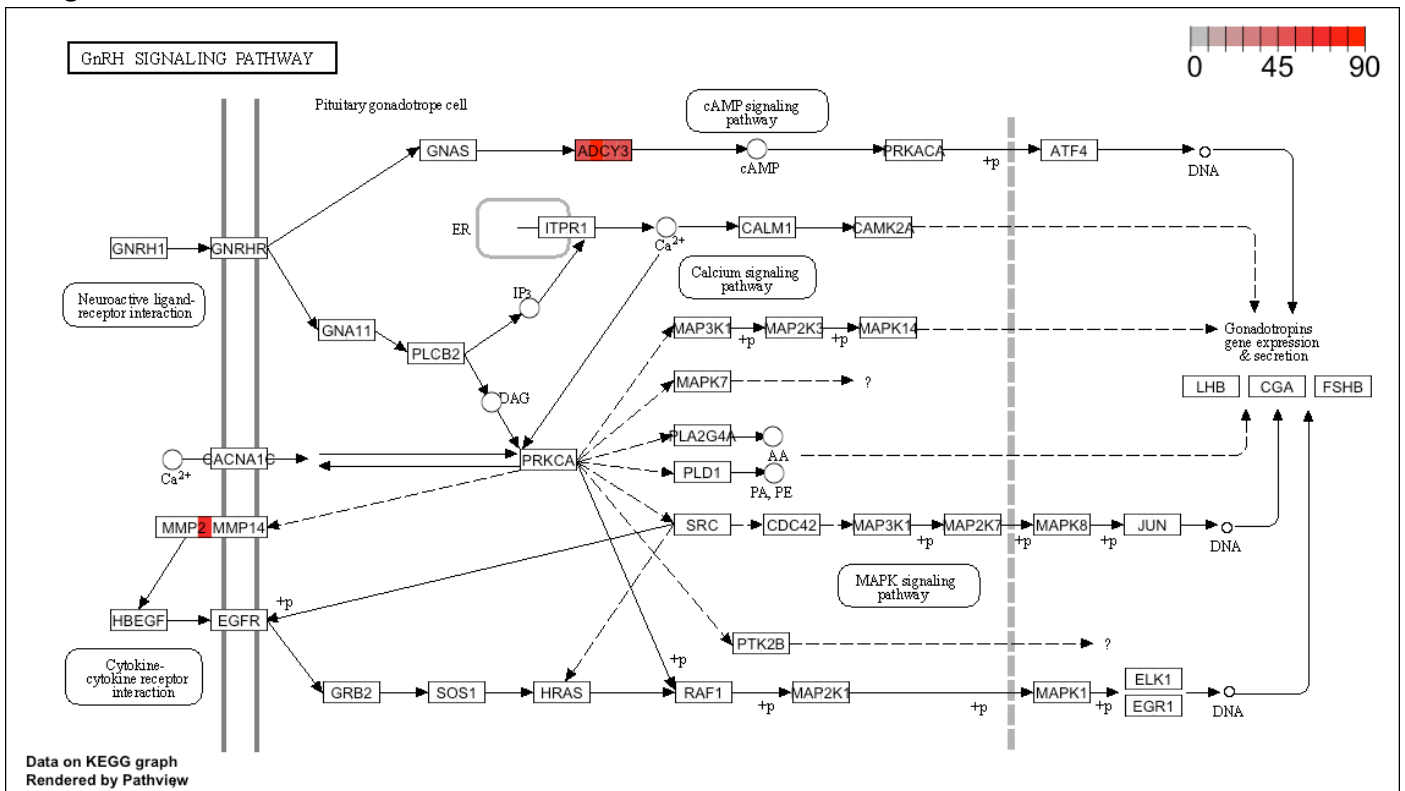



eFigure 12

Chromosome 7

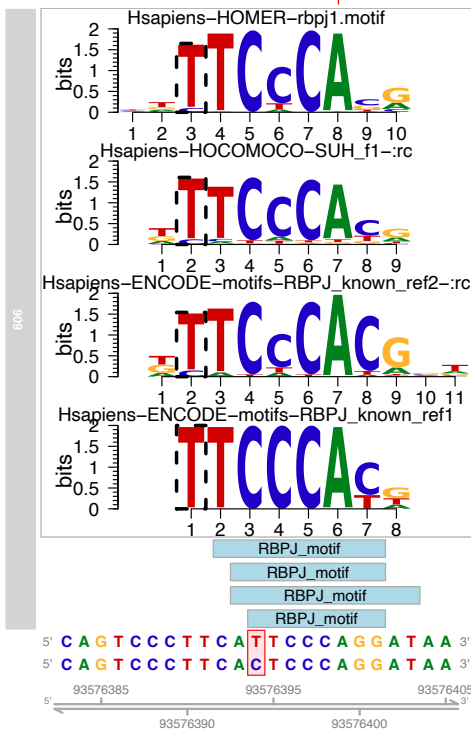

Chromosome 11

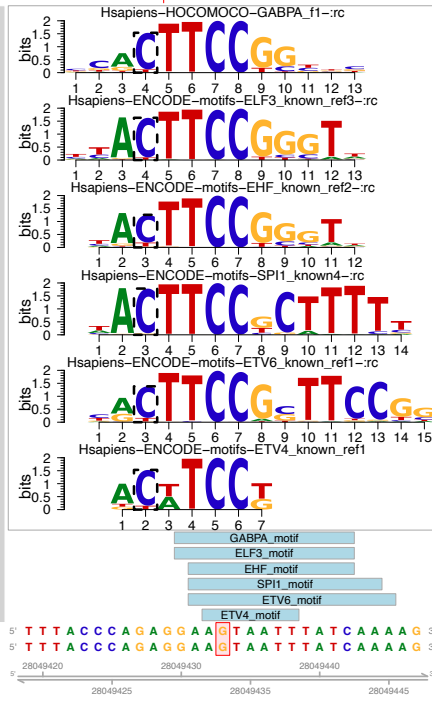

Chromosome 11

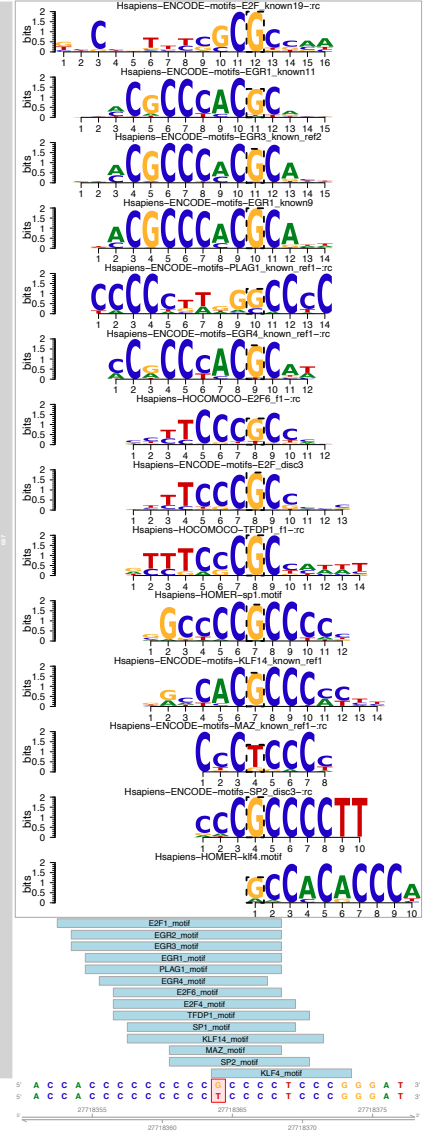

Chromosome 2

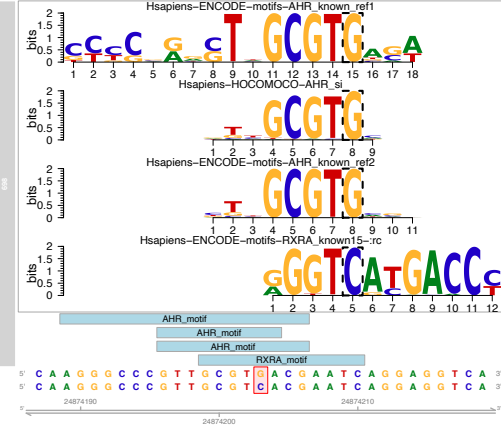

Chromosome 11

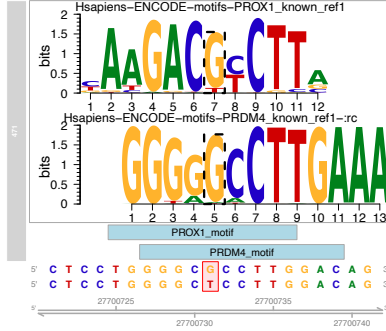

Chromosome 2

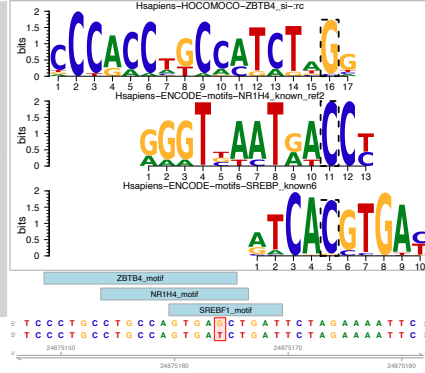

Chromosome 2

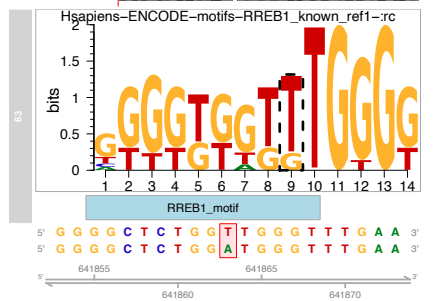

Supplement: Supplementary file [file media-1.pdf]
